# Supplementary material for: Mechanism of NanR gene repression and allosteric induction of bacterial sialic acid metabolism
Source: PubMed Central journal article supplement (PMC8012715; doi:10.1038/s41467-021-22253-6), 2021-03-31
Supplement: 41467_2021_22253_MOESM3_ESM.pdf [file 41467_2021_22253_MOESM3_ESM.pdf]

### **Description of Additional Supplementary Files**

File Name: Supplementary Movie 1

Description: X-ray crystal structure of NanR in complex with Neu5Ac and Zn<sup>2+</sup> and closeup of the effector binding site.

Accompaniment to Fig. 4b-c.

File Name: Supplementary Movie 2

Description: Cryo-EM structure of the NanR-dimer1/DNA hetero-complex and closeup on the protein-DNA interface.

Accompaniment to Fig. 5.

File Name: Supplementary Movie 3

Description: Morph model to illustrate the conformational change between the DNA-free (X-ray crystal structure) and the DNA-bound (cryo-EM structure) states.

Accompaniment to Fig. 6.

File Name: Supplementary Movie 4

Description: Cryo-EM structure of the NanR-dimer3/DNA hetero-complex and closeup of each dimer assembled across the (GGTATA)<sub>3</sub>-repeat operator DNA.

Accompaniment to Fig. 7.
